# Supplementary material
Source: ML conference proceedings conference paper supplement (https://openreview.net/forum?id=XEkQu1ZWGN)
Supplement: supplementary_material [file temp.xlsx]

## Sheet: pretrain-sft-ab-buch
		MSE	MAE	R2
suzuki	w/o sft	2407.22	40.272	-2.05412
suzuki	w/o pre and sft	2338.02	39.4324	-1.96632
suzuki	Full	633.678	19.4744	0.196032
arylation	only pretrain without sft	1853.7	33.2412	-1.488
arylation	no pretrain nor sft	1797.88	32.5395	-1.41307
arylation	Full	650.003	19.5496	0.127581
buchwald_Cc1ccc(Nc2ccc(C(F)(F)F)cc2)cc1	only pretrain without sft	819.005	24.2283	-2.5388
buchwald_Cc1ccc(Nc2ccc(C(F)(F)F)cc2)cc1	no pretrain nor sft	830.577	24.4807	-2.5888
buchwald_Cc1ccc(Nc2ccc(C(F)(F)F)cc2)cc1	Full
buchwald_Cc1ccc(Nc2ccccn2)cc1	only pretrain without sft	3393.71	51.373	-3.4957
buchwald_Cc1ccc(Nc2ccccn2)cc1	no pretrain nor sft	3523.18	52.614	-3.66722
buchwald_Cc1ccc(Nc2ccccn2)cc1	Full
buchwald_Cc1ccc(Nc2cccnc2)cc1	only pretrain without sft	2234.04	36.6285	-1.50064
buchwald_Cc1ccc(Nc2cccnc2)cc1	no pretrain nor sft	2280.1	37.2379	-1.5522
buchwald_Cc1ccc(Nc2cccnc2)cc1	Full
buchwald_CCc1ccc(Nc2ccc(C)cc2)cc1	only pretrain without sft	1904.9	32.595	-1.23781
buchwald_CCc1ccc(Nc2ccc(C)cc2)cc1	no pretrain nor sft	2039.29	34.4689	-1.39568
buchwald_CCc1ccc(Nc2ccc(C)cc2)cc1	Full
buchwald_COc1ccc(Nc2ccc(C)cc2)cc1	only pretrain without sft	836.271	20.7574	-1.06721
buchwald_COc1ccc(Nc2ccc(C)cc2)cc1	no pretrain nor sft	856.106	21.2545	-1.11624
buchwald_COc1ccc(Nc2ccc(C)cc2)cc1	Full

## Sheet: pretrain-sft-ab-grouped
Dataset		MSE	MAE	R2
suzuki	only pretrain without sft	2407.22	40.272	-2.05412
suzuki	w/o pre and sft	2338.02	39.4324	-1.96632
suzuki	no pretrain but sft	685.551	20.5031	0.130219
suzuki	Full	633.678	19.4744	0.196032
Dataset		MSE	MAE	R2
arylation	only pretrain without sft	1853.7	33.2412	-1.488
arylation	w/o pre and sft	1797.88	32.5395	-1.41307
arylation	no pretrain but sft	679.72	19.5725	0.087695
arylation	Full	650.003	19.5496	0.127581
Dataset		MSE	MAE	R2
Buchwald	only pretrain without sft	1795.72	32.5244	-1.41104
Buchwald	w/o pre and sft	1881.96	33.7267	-1.52683
Buchwald	no pretrain but sft	739.273	20.5654	0.00740594
Buchwald	Full	593.761	18.5183	0.20278

## Sheet: base_model_compare
		MSE	MAE	R2
suzuki	LLaMA	685.551	20.5031	0.130219
suzuki	Qwen3	820.485	22.1032	-0.0409768
suzuki	GLM4	593.492	18.9369	0.247017
arylation	LLaMA	679.72	19.5725	0.087695
arylation	Qwen3	848.514	22.5248	-0.138856
arylation	GLM4	739.199	20.7771	0.00786358
Buchwald	LLaMA	739.273	20.5654	0.00740594
Buchwald	Qwen3	998.223	25.2487	-0.340276
Buchwald	GLM4	719.719	20.7736	0.00336601

## Sheet: data_scale
Dataset		MSE	MAE	R2
suzuki	0.25	1205.19	27.799	-0.528316
suzuki	0.5	774.704	21.1268	0.0177138
suzuki	1	633.678	19.4744	0.196032
suzuki	2	479.089	15.9247	0.391138
suzuki	4	360.02	13.4449	0.540699
Dataset		MSE	MAE	R2
arylation	0.25	793.916	24.2037	-0.0654181
arylation	0.5	1016.37	26.5346	-0.363307
arylation	1	650.003	19.5496	0.127581
arylation	2	462.515	15.752	0.380198
arylation	4	286.564	11.9658	0.616613
Dataset		MSE	MAE	R2
Buchwald	0.25	737.64	23.5041	0.00992227
Buchwald	0.5	617.28	19.8122	0.171246
Buchwald	1	593.761	18.5183	0.20278
Buchwald	2	365.596	13.9842	0.509799
Buchwald	4	248.438	11.2823	0.666073

## Sheet: diff_batch_size
	Dataset	Batch Percentage	Batch Size	Best Found	Iteration of Best Found	Initial Value	Time
	reaction1	0.0005	3	96.15	3	72.98	105.18
	reaction1	0.001	5	96.15	3	72.98	158.03
	reaction1	0.002	10	96.15	3	72.98	318.11
	reaction1	0.004	20	96.15	3	72.98	646.02
	reaction2	0.0005	2	80.6672	37	78.7077	59.24
	reaction2	0.001	3	80.641	39	78.7077	95.01
	reaction2	0.002	6	81.6465	39	78.7077	240.63
	reaction2	0.004	12	81.2536	29	78.7077	755.86
	reaction3	0.0005	-	-	-	-	-
	reaction3	0.001	1	79.579	25	75.5548	10.506
	reaction3	0.002	2	79.3871	23	75.5548	24.4277
	reaction3	0.004	4	79.6018	25	75.5548	56.3005
	reaction4	0.0005	-	-	-	-	-
	reaction4	0.001	1	56.8062	2	53.335	8.77314
	reaction4	0.002	2	56.8062	2	53.335	20.5676
	reaction4	0.004	4	56.8062	2	53.335	49.0239

## Sheet: data_scale_2
Dataset	Scale Percentage	Scale Size	Best Found	Iteration of Best	Inital Value	Std
Reaction-1	0.01	50	88.978	37	65.95	7.27307
Reaction-1	0.02	100	88.994	36	70.248	7.25501
Reaction-1	0.04	200	91.412	40	52.134	5.68811
Reaction-2	0.01	30	79.6675	40	45.9838	0.0573613
Reaction-2	0.02	60	81.6498	40	48.945	2.44948
Reaction-2	0.04	120	83.8094	31	37.1107	0.420158
Reaction-3	0.01	7	79.6293	31	54.0741	0.124892
Reaction-3	0.02	14	79.5599	39	41.144	0.136087
Reaction-3	0.04	28	80.9063	15	32.3566	0
Reaction-4	0.01	7	56.8062	11	12.8705	7.10543e-15
Reaction-4	0.02	14	53.9505	38	15.5863	0.58321
Reaction-4	0.04	28	53.9339	40	16.2173	0.809951
